# Supplementary material for: Mental Health in Times of the COVID-19 Pandemic
Source: Atypon-hosted journal article supplement (doi:10.1027/1016-9040/a000465), 2021-10-01
Supplement: 1016-9040_a000465_esm1.pdf [file 1016-9040_a000465_esm1.pdf]

**Supplement 1.** Records retrieved on June 7 2021 for search-terms *COVID-19*, *mental health*, *longitudinal*, and *Europe*

**PubMed search**

- 1: Elmer T, Mepham K, Stadtfeld C. Students under lockdown: Comparisons of students' social networks and mental health before and during the COVID-19 crisis in Switzerland. *PLoS One*. 2020 Jul 23;15(7):e0236337. doi: 10.1371/journal.pone.0236337. PMID: 32702065; PMCID: PMC7377438.
  
- 2: Pierce M, Hope H, Ford T, Hatch S, Hotopf M, John A, Kontopantelis E, Webb R, Wessely S, McManus S, Abel KM. Mental health before and during the COVID-19 pandemic: a longitudinal probability sample survey of the UK population. *Lancet Psychiatry*. 2020 Oct;7(10):883-892. doi: 10.1016/S2215-0366(20)30308-4. Epub 2020 Jul 21. PMID: 32707037; PMCID: PMC7373389.
  
- 3: Pan KY, Kok AAL, Eikelenboom M, Horsfall M, Jörg F, Luteijn RA, Rhebergen D, Oppen PV, Giltay EJ, Penninx BWJH. The mental health impact of the COVID-19 pandemic on people with and without depressive, anxiety, or obsessive-compulsive disorders: a longitudinal study of three Dutch case-control cohorts. *Lancet Psychiatry*. 2021 Feb;8(2):121-129. doi: 10.1016/S2215-0366(20)30491-0. Epub 2020 Dec 8. Erratum in: *Lancet Psychiatry*. 2021 Mar;8(3):e11. PMID: 33306975; PMCID: PMC7831806.
  
- 4: González-Sanguino C, Ausín B, Castellanos MA, Saiz J, Muñoz M. Mental health consequences of the Covid-19 outbreak in Spain. A longitudinal study of the alarm situation and return to the new normality. *Prog Neuropsychopharmacol Biol Psychiatry*. 2021 Apr 20;107:110219. doi: 10.1016/j.pnpbp.2020.110219. Epub 2020 Dec 15. PMID: 33338556; PMCID: PMC7833458.
  
- 5: Niedzwiedz CL, Green MJ, Benzeval M, Campbell D, Craig P, Demou E, Leyland A, Pearce A, Thomson R, Whitley E, Katikireddi SV. Mental health and health behaviours before and during the initial phase of the COVID-19 lockdown: longitudinal analyses of the UK Household Longitudinal Study. *J Epidemiol Community Health*. 2021 Mar;75(3):224-231. doi: 10.1136/jech-2020-215060. Epub 2020 Sep 25. PMID: 32978210; PMCID: PMC7892383.

6: Ezpeleta L, Navarro JB, de la Osa N, Trepate E, Penelo E. Life Conditions during COVID-19 Lockdown and Mental Health in Spanish Adolescents. *Int J Environ Res Public Health*. 2020 Oct 7;17(19):7327. doi: 10.3390/ijerph17197327. PMID: 33036461; PMCID: PMC7579639.

7: Matiz A, Fabbro F, Paschetto A, Cantone D, Paolone AR, Crescentini C. Positive Impact of Mindfulness Meditation on Mental Health of Female Teachers during the COVID-19 Outbreak in Italy. *Int J Environ Res Public Health*. 2020 Sep 4;17(18):6450. doi: 10.3390/ijerph17186450. PMID: 32899739; PMCID: PMC7559290.

8: Prati G, Mancini AD. The psychological impact of COVID-19 pandemic lockdowns: a review and meta-analysis of longitudinal studies and natural experiments. *Psychol Med*. 2021 Jan;51(2):201-211. doi: 10.1017/S0033291721000015. Epub 2021 Jan 13. PMID: 33436130; PMCID: PMC7844215.

9: Fancourt D, Steptoe A, Bu F. Trajectories of anxiety and depressive symptoms during enforced isolation due to COVID-19 in England: a longitudinal observational study. *Lancet Psychiatry*. 2021 Feb;8(2):141-149. doi: 10.1016/S2215-0366(20)30482-X. Epub 2020 Dec 9. PMID: 33308420; PMCID: PMC7820109.

10: Chodkiewicz J, Talarowska M, Miniszewska J, Nawrocka N, Bilinski P. Alcohol Consumption Reported during the COVID-19 Pandemic: The Initial Stage. *Int J Environ Res Public Health*. 2020 Jun 29;17(13):4677. doi: 10.3390/ijerph17134677. PMID: 32610613; PMCID: PMC7369979.

11: Janssen LHC, Kullberg MJ, Verkuil B, van Zwieten N, Wever MCM, van Houtum LAEM, Wentholt WGM, Elzinga BM. Does the COVID-19 pandemic impact parents' and adolescents' well-being? An EMA-study on daily affect and parenting. *PLoS One*. 2020 Oct 16;15(10):e0240962. doi: 10.1371/journal.pone.0240962. PMID: 33064778; PMCID: PMC7567366.

12: Peeters LM, Parciak T, Walton C, Geys L, Moreau Y, De Brouwer E, Raimondi D, Pirmani A, Kalincik T, Edan G, Simpson-Yap S, De Raedt L, Dauxais Y, Gautrais C,

Rodrigues PR, McKenna L, Lazovski N, Hillert J, Forsberg L, Spelman T, McBurney R, Schmidt H, Bergmann A, Braune S, Stahmann A, Middleton R, Salter A, Bebo BF, Rojas JI, van der Walt A, Butzkueven H, van der Mei I, Ivanov R, Hellwig K, Sciascia do Olival G, Cohen JA, Van Hecke W, Dobson R, Magyari M, Brum DG, Alonso R, Nicholas R, Bauer J, Chertcoff A, de Sèze J, Louapre C, Comi G, Rijke N. COVID-19 in people with multiple sclerosis: A global data sharing initiative. *Mult Scler.* 2020 Sep;26(10):1157-1162. doi: 10.1177/1352458520941485. Epub 2020 Jul 14. PMID: 32662757; PMCID: PMC7361123.

13: Ramiz L, Contrand B, Rojas Castro MY, Dupuy M, Lu L, Sztal-Kutas C, Lagarde E. A longitudinal study of mental health before and during COVID-19 lockdown in the French population. *Global Health.* 2021 Mar 22;17(1):29. doi: 10.1186/s12992-021-00682-8. PMID: 33752717; PMCID: PMC7982911.

14: Proto E, Quintana-Domeque C. COVID-19 and mental health deterioration by ethnicity and gender in the UK. *PLoS One.* 2021 Jan 6;16(1):e0244419. doi: 10.1371/journal.pone.0244419. PMID: 33406085; PMCID: PMC7787387.

15: Castellini G, Rossi E, Cassioli E, Sanfilippo G, Innocenti M, Gironi V, Silvestri C, Voller F, Ricca V. A longitudinal observation of general psychopathology before the COVID-19 outbreak and during lockdown in Italy. *J Psychosom Res.* 2021 Feb;141:110328. doi: 10.1016/j.jpsychores.2020.110328. Epub 2020 Dec 4. PMID: 33316632; PMCID: PMC7716728.

16: Kivi M, Hansson I, Bjälkebring P. Up and About: Older Adults' Well-being During the COVID-19 Pandemic in a Swedish Longitudinal Study. *J Gerontol B Psychol Sci Soc Sci.* 2021 Jan 18;76(2):e4-e9. doi: 10.1093/geronb/gbaa084. PMID: 32599622; PMCID: PMC7337833.

17: Moser A, Carlander M, Wieser S, Hämmig O, Puhan MA, Höglinger M. The COVID-19 Social Monitor longitudinal online panel: Real-time monitoring of social and public health consequences of the COVID-19 emergency in Switzerland. *PLoS One.* 2020 Nov 11;15(11):e0242129. doi: 10.1371/journal.pone.0242129. PMID: 33175906; PMCID: PMC7657546.

18: Iob E, Steptoe A, Fancourt D. Abuse, self-harm and suicidal ideation in the UK during the COVID-19 pandemic. *Br J Psychiatry*. 2020 Oct;217(4):543-546. doi: 10.1192/bjp.2020.130. PMID: 32654678; PMCID: PMC7360935.

19: Thombs BD, Kwakkenbos L, Henry RS, Carrier ME, Patten S, Harb S, Bourgeault A, Tao L, Bartlett SJ, Mouthon L, Varga J, Benedetti A; SPIN Patient Advisors; SPIN Investigators. Changes in mental health symptoms from pre-COVID-19 to COVID-19 among participants with systemic sclerosis from four countries: A Scleroderma Patient-centered Intervention Network (SPIN) Cohort study. *J Psychosom Res*. 2020 Dec;139:110262. doi: 10.1016/j.jpsychores.2020.110262. Epub 2020 Oct 3. PMID: 33070043; PMCID: PMC7532799.

20: Provenzi L, Grumi S, Giorda R, Biasucci G, Bonini R, Cavallini A, Decembrino L, Drera B, Falcone R, Fazzi E, Gardella B, Giaccherio R, Nacinovich R, Pisoni C, Prefumo F, Scelsa B, Spartà MV, Veggiotti P, Orcesi S, Borgatti R; MOM-COPE Study Group. Measuring the Outcomes of Maternal COVID-19-related Prenatal Exposure (MOM-COPE): study protocol for a multicentric longitudinal project. *BMJ Open*. 2020 Dec 31;10(12):e044585. doi: 10.1136/bmjopen-2020-044585. PMID: 33384402; PMCID: PMC7780424.

21: van der Velden PG, Contino C, Das M, van Loon P, Bosmans MWG. Anxiety and depression symptoms, and lack of emotional support among the general population before and during the COVID-19 pandemic. A prospective national study on prevalence and risk factors. *J Affect Disord*. 2020 Dec 1;277:540-548. doi: 10.1016/j.jad.2020.08.026. Epub 2020 Aug 20. PMID: 32889378; PMCID: PMC7438386.

22: Krammer S, Augstburger R, Haeck M, Maercker A. Anpassungsstörung, Depression, Stresssymptome, Corona bezogene Sorgen und Bewältigungsstrategien während der Corona Pandemie (COVID-19) bei Schweizer Klinikpersonal [Adjustment Disorder, Depression, Stress Symptoms, Corona Related Anxieties and Coping Strategies during the Corona Pandemic (COVID-19) in Swiss Medical Staff]. *Psychother Psychosom Med Psychol*. 2020 Jul;70(7):272-282. German. doi: 10.1055/a-1192-6608. Epub 2020 Jul 20. PMID: 32688420.

23: Amatori S, Donati Zeppa S, Preti A, Gervasi M, Gobbi E, Ferrini F, Rocchi MBL, Baldari C, Perroni F, Piccoli G, Stocchi V, Sestili P, Sisti D. Dietary Habits and Psychological States during COVID-19 Home Isolation in Italian College Students: The Role of Physical Exercise. *Nutrients*. 2020 Nov 28;12(12):3660. doi: 10.3390/nu12123660. PMID: 33260711; PMCID: PMC7759990.

24: Bu F, Steptoe A, Fancourt D. Who is lonely in lockdown? Cross-cohort analyses of predictors of loneliness before and during the COVID-19 pandemic. *Public Health*. 2020 Sep;186:31-34. doi: 10.1016/j.puhe.2020.06.036. Epub 2020 Aug 5. PMID: 32768621; PMCID: PMC7405905.

25: Cheval B, Sivaramakrishnan H, Maltagliati S, Fessler L, Forestier C, Sarrazin P, Orsholits D, Chalabaev A, Sander D, Ntoumanis N, Boisgontier MP. Relationships between changes in self-reported physical activity, sedentary behaviour and health during the coronavirus (COVID-19) pandemic in France and Switzerland. *J Sports Sci*. 2021 Mar;39(6):699-704. doi: 10.1080/02640414.2020.1841396. Epub 2020 Oct 29. PMID: 33118469.

26: Savage MJ, Hennis PJ, Magistro D, Donaldson J, Healy LC, James RM. Nine Months into the COVID-19 Pandemic: A Longitudinal Study Showing Mental Health and Movement Behaviours Are Impaired in UK Students. *Int J Environ Res Public Health*. 2021 Mar 12;18(6):2930. doi: 10.3390/ijerph18062930. PMID: 33809313; PMCID: PMC7999965.

27: Robertson M, Duffy F, Newman E, Prieto Bravo C, Ates HH, Sharpe H. Exploring changes in body image, eating and exercise during the COVID-19 lockdown: A UK survey. *Appetite*. 2021 Apr 1;159:105062. doi: 10.1016/j.appet.2020.105062. Epub 2020 Dec 3. PMID: 33278549; PMCID: PMC7711175.

28: Steptoe A, Di Gessa G. Mental health and social interactions of older people with physical disabilities in England during the COVID-19 pandemic: a longitudinal cohort study. *Lancet Public Health*. 2021 Jun;6(6):e365-e373. doi: 10.1016/S2468-2667(21)00069-4. Epub 2021 Apr 21. PMID: 33894138.

29: Okely JA, Corley J, Welstead M, Taylor AM, Page D, Skarabela B, Redmond P, Cox SR, Russ TC. Change in Physical Activity, Sleep Quality, and Psychosocial Variables during COVID-19 Lockdown: Evidence from the Lothian Birth Cohort 1936.

*Int J Environ Res Public Health*. 2020 Dec 30;18(1):210. doi:

10.3390/ijerph18010210. PMID: 33396611; PMCID: PMC7795040.

30: Savolainen I, Oksa R, Savela N, Celuch M, Oksanen A. COVID-19 Anxiety-A Longitudinal Survey Study of Psychological and Situational Risks among Finnish Workers.

*Int J Environ Res Public Health*. 2021 Jan 19;18(2):794. doi:

10.3390/ijerph18020794. PMID: 33477756; PMCID: PMC7832302.

31: Burton-Jeangros C, Duvoisin A, Lachat S, Consoli L, Fakhoury J, Jackson Y.

The Impact of the Covid-19 Pandemic and the Lockdown on the Health and Living Conditions of Undocumented Migrants and Migrants Undergoing Legal Status

Regularization. *Front Public Health*. 2020 Dec 16;8:596887. doi:

10.3389/fpubh.2020.596887. PMID: 33392134; PMCID: PMC7772178.

32: Naurin E, Markstedt E, Stolle D, Enström D, Wallin A, Andreasson I, Attebo B, Eriksson O, Martinsson K, Elden H, Linden K, Sengpiel V. Pregnant under the pressure of a pandemic: a large-scale longitudinal survey before and during the

COVID-19 outbreak. *Eur J Public Health*. 2021 Feb 1;31(1):7-13. doi:

10.1093/eurpub/ckaa223. PMID: 33231625; PMCID: PMC7717243.

33: Bendau A, Plag J, Kunas S, Wyka S, Ströhle A, Petzold MB. Longitudinal changes in anxiety and psychological distress, and associated risk and

protective factors during the first three months of the COVID-19 pandemic in

Germany. *Brain Behav*. 2021 Feb;11(2):e01964. doi: 10.1002/brb3.1964. Epub 2020

Nov 23. PMID: 33230969; PMCID: PMC7744907.

34: Stolz E, Mayerl H, Freidl W. The impact of COVID-19 restriction measures on loneliness among older adults in Austria. *Eur J Public Health*. 2021 Feb

1;31(1):44-49. doi: 10.1093/eurpub/ckaa238. PMID: 33338225; PMCID: PMC7799060.

35: Naughton F, Ward E, Khondoker M, Belderson P, Marie Minihane A, Dainty J, Hanson S, Holland R, Brown T, Notley C. Health behaviour change during the UK COVID-19 lockdown: Findings from the first wave of the C-19 health behaviour and well-being daily tracker study. *Br J Health Psychol.* 2021 May;26(2):624-643. doi: 10.1111/bjhp.12500. Epub 2021 Jan 6. PMID: 33410229.

36: Lotzin A, Acquarini E, Ajdukovic D, Ardino V, Böttche M, Bondjers K, Bragesjö M, Dragan M, Grajewski P, Figueiredo-Braga M, Gelezelyte O, Javakhishvili JD, Kazlauskas E, Knefel M, Lueger-Schuster B, Makhashvili N, Mooren T, Sales L, Stevanovic A, Schäfer I. Stressors, coping and symptoms of adjustment disorder in the course of the COVID-19 pandemic - study protocol of the European Society for Traumatic Stress Studies (ESTSS) pan-European study. *Eur J Psychotraumatol.* 2020 Aug 27;11(1):1780832. doi: 10.1080/20008198.2020.1780832. PMID: 33029321; PMCID: PMC7473046.

37: Giebel C, Pulford D, Cooper C, Lord K, Shenton J, Cannon J, Shaw L, Tetlow H, Limbert S, Callaghan S, Whittington R, Rogers C, Komuravelli A, Rajagopal M, Eley R, Downs M, Reilly S, Ward K, Gaughan A, Butchard S, Beresford J, Watkins C, Bennett K, Gabbay M. COVID-19-related social support service closures and mental well-being in older adults and those affected by dementia: a UK longitudinal survey. *BMJ Open.* 2021 Jan 17;11(1):e045889. doi: 10.1136/bmjopen-2020-045889. PMID: 33455941; PMCID: PMC7813330.

38: Evans S, Alkan E, Bhangoo JK, Tenenbaum H, Ng-Knight T. Effects of the COVID-19 lockdown on mental health, wellbeing, sleep, and alcohol use in a UK student sample. *Psychiatry Res.* 2021 Apr;298:113819. doi: 10.1016/j.psychres.2021.113819. Epub 2021 Feb 23. PMID: 33640864.

39: Thorpe J, Ashby S, Hallab A, Ding D, Andraus M, Dugan P, Perucca P, Costello D, French JA, O'Brien TJ, Depondt C, Andrade DM, Sengupta R, Delanty N, Jette N, Newton CR, Brodie MJ, Devinsky O, Helen Cross J, Sander JW, Hanna J, Sen A; COVID-19 and Epilepsy (COV-E) Study Group. Evaluating risk to people with epilepsy during the COVID-19 pandemic: Preliminary findings from the COV-E study. *Epilepsy Behav.* 2021 Feb;115:107658. doi: 10.1016/j.yebeh.2020.107658.

Epub 2020 Nov 28. PMID: 33341393; PMCID: PMC7698680.

40: Bu F, Steptoe A, Fancourt D. Loneliness during a strict lockdown: Trajectories and predictors during the COVID-19 pandemic in 38,217 United Kingdom adults. *Soc Sci Med*. 2020 Nov;265:113521. doi: 10.1016/j.socscimed.2020.113521. Epub 2020 Nov 12. PMID: 33257177; PMCID: PMC7768183.

41: van der Velden PG, Hyland P, Contino C, von Gaudecker HM, Muffels R, Das M. Anxiety and depression symptoms, the recovery from symptoms, and loneliness before and after the COVID-19 outbreak among the general population: Findings from a Dutch population-based longitudinal study. *PLoS One*. 2021 Jan 7;16(1):e0245057. doi: 10.1371/journal.pone.0245057. PMID: 33411843; PMCID: PMC7790276.

42: Groarke JM, McGlinchey E, McKenna-Plumley PE, Berry E, Graham-Wisener L, Armour C. Examining temporal interactions between loneliness and depressive symptoms and the mediating role of emotion regulation difficulties among UK residents during the COVID-19 lockdown: Longitudinal results from the COVID-19 psychological wellbeing study. *J Affect Disord*. 2021 Apr 15;285:1-9. doi: 10.1016/j.jad.2021.02.033. Epub 2021 Feb 15. PMID: 33610876.

43: Salfi F, D'Atri A, Tempesta D, Ferrara M. Sleeping under the waves: A longitudinal study across the contagion peaks of the COVID-19 pandemic in Italy. *J Sleep Res*. 2021 Mar 9:e13313. doi: 10.1111/jsr.13313. Epub ahead of print. PMID: 33687798.\*

44: Wright L, Steptoe A, Fancourt D. Are we all in this together? Longitudinal assessment of cumulative adversities by socioeconomic position in the first 3 weeks of lockdown in the UK. *J Epidemiol Community Health*. 2020 Sep;74(9):683-688. doi: 10.1136/jech-2020-214475. Epub 2020 Jun 5. PMID: 32503892; PMCID: PMC7298206.

45: Bendau A, Kunas SL, Wyka S, Petzold MB, Plag J, Asselmann E, Ströhle A.



Longitudinal changes of anxiety and depressive symptoms during the COVID-19 pandemic in Germany: The role of pre-existing anxiety, depressive, and other mental disorders. *J Anxiety Disord.* 2021 Apr;79:102377. doi: 10.1016/j.janxdis.2021.102377. Epub 2021 Feb 24. PMID: 33662702.

46: Megalakaki O, Kokou-Kpolou CK, Vaudé J, Park S, Iorfa SK, Cénat JM, Derivois D. Does peritraumatic distress predict PTSD, depression and anxiety symptoms during and after COVID-19 lockdown in France? A prospective longitudinal study. *J Psychiatr Res.* 2021 May;137:81-88. doi: 10.1016/j.jpsychires.2021.02.035. Epub 2021 Feb 16. PMID: 33662655; PMCID: PMC7885671.

47: Schug C, Morawa E, Geiser F, Hiebel N, Beschoner P, Jerg-Bretzke L, Albus C, Weidner K, Steudte-Schmiedgen S, Borho A, Lieb M, Erim Y. Social Support and Optimism as Protective Factors for Mental Health among 7765 Healthcare Workers in Germany during the COVID-19 Pandemic: Results of the VOICE Study. *Int J Environ Res Public Health.* 2021 Apr 6;18(7):3827. doi: 10.3390/ijerph18073827. PMID: 33917493; PMCID: PMC8038794.

48: Wright L, Steptoe A, Fancourt D. Are adversities and worries during the COVID-19 pandemic related to sleep quality? Longitudinal analyses of 46,000 UK adults. *PLoS One.* 2021 Mar 25;16(3):e0248919. doi: 10.1371/journal.pone.0248919. PMID: 33765097; PMCID: PMC7993810.

49: Beck F, Leger D, Cortaredona S, Verger P, Peretti-Watel P; COCONEL group. Would we recover better sleep at the end of Covid-19? A relative improvement observed at the population level with the end of the lockdown in France. *Sleep Med.* 2021 Feb;78:115-119. doi: 10.1016/j.sleep.2020.11.029. Epub 2020 Dec 8. PMID: 33422813; PMCID: PMC7722490.

50: Brailovskaia J, Cosci F, Mansueto G, Miragall M, Herrero R, Baños RM, Krasavtseva Y, Kochetkov Y, Margraf J. The association between depression symptoms, psychological burden caused by Covid-19 and physical activity: An investigation in Germany, Italy, Russia, and Spain. *Psychiatry Res.* 2021 Jan;295:113596. doi: 10.1016/j.psychres.2020.113596. Epub 2020 Nov 26. PMID:

33261924; PMID: PMC7688416.

51: Varga TV, Bu F, Dissing AS, Elsenburg LK, Bustamante JJH, Matta J, van Zon SKR, Brouwer S, Bültmann U, Fancourt D, Hoeyer K, Goldberg M, Melchior M, Strandberg-Larsen K, Zins M, Clotworthy A, Rod NH. Loneliness, worries, anxiety, and precautionary behaviours in response to the COVID-19 pandemic: A longitudinal analysis of 200,000 Western and Northern Europeans. *Lancet Reg Health Eur.* 2021 Mar;2:100020. doi: 10.1016/j.lanepe.2020.100020. PMID: 33870246; PMID: PMC8042675.

52: Madsen KP, Willaing I, Rod NH, Varga TV, Joensen LE. Psychosocial health in people with diabetes during the first three months of the COVID-19 pandemic in Denmark. *J Diabetes Complications.* 2021 Apr;35(4):107858. doi: 10.1016/j.jdiacomp.2021.107858. Epub 2021 Jan 20. PMID: 33573890; PMID: PMC7816585.

53: Herle M, Smith AD, Bu F, Steptoe A, Fancourt D. Trajectories of eating behavior during COVID-19 lockdown: Longitudinal analyses of 22,374 adults. *Clin Nutr ESPEN.* 2021 Apr;42:158-165. doi: 10.1016/j.clnesp.2021.01.046. Epub 2021 Feb 9. PMID: 33745572; PMID: PMC7871880.

54: Oomen D, Nijhof AD, Wiersema JR. The psychological impact of the COVID-19 pandemic on adults with autism: a survey study across three countries. *Mol Autism.* 2021 Mar 3;12(1):21. doi: 10.1186/s13229-021-00424-y. PMID: 33658046; PMID: PMC7927758.

55: Alivernini F, Manganelli S, Girelli L, Cozzolino M, Lucidi F, Cavicchiolo E. Physical Distancing Behavior: The Role of Emotions, Personality, Motivations, and Moral Decision-Making. *J Pediatr Psychol.* 2021 Jan 20;46(1):15-26. doi: 10.1093/jpepsy/jsaa122. PMID: 33355343; PMID: PMC7798981.

56: Murphy M, Scott LJ, Salisbury C, Turner A, Scott A, Denholm R, Lewis R, Iyer G, Macleod J, Horwood J. Implementation of remote consulting in UK primary care following the COVID-19 pandemic: a mixed-methods longitudinal study. *Br J Gen*

Pract. 2021 Feb 25;71(704):e166-e177. doi: 10.3399/BJGP.2020.0948. PMID: 33558332; PMCID: PMC7909923.

57: Hoogendijk EO, van der Horst MHL, Poppelaars J, van Vliet M, Huisman M. Multiple domains of functioning in older adults during the pandemic: design and basic characteristics of the Longitudinal Aging Study Amsterdam COVID-19 questionnaire. *Aging Clin Exp Res.* 2021 May;33(5):1423-1428. doi: 10.1007/s40520-021-01829-8. Epub 2021 Mar 15. PMID: 33721247; PMCID: PMC7957282.

58: Ehrler M, Werninger I, Schnider B, Eichelberger DA, Naef N, Disselhoff V, Kretschmar O, Hagmann CF, Latal B, Wehrle FM. Impact of the COVID-19 pandemic on children with and without risk for neurodevelopmental impairments. *Acta Paediatr.* 2021 Apr;110(4):1281-1288. doi: 10.1111/apa.15775. Epub 2021 Feb 9. PMID: 33486835.

59: Romero-Duarte Á, Rivera-Izquierdo M, Guerrero-Fernández de Alba I, Pérez-Contreras M, Fernández-Martínez NF, Ruiz-Montero R, Serrano-Ortiz Á, González-Serna RO, Salcedo-Leal I, Jiménez-Mejías E, Cárdenas-Cruz A. Sequelae, persistent symptomatology and outcomes after COVID-19 hospitalization: the ANCOHVID multicentre 6-month follow-up study. *BMC Med.* 2021 May 20;19(1):129. doi: 10.1186/s12916-021-02003-7. PMID: 34011359; PMCID: PMC8134820.

60: Durosini I, Triberti S, Savioni L, Pravettoni G. In the eye of a quiet storm: A critical incident study on the quarantine experience during the coronavirus pandemic. *PLoS One.* 2021 Feb 17;16(2):e0247121. doi: 10.1371/journal.pone.0247121. PMID: 33596268; PMCID: PMC7888600.

61: Kuper H, Shakespeare T. Are older people with disabilities neglected in the COVID-19 pandemic? *Lancet Public Health.* 2021 Jun;6(6):e347-e348. doi: 10.1016/S2468-2667(21)00077-3. Epub 2021 Apr 21. PMID: 33894139.

62: Gullo S, Misici I, Teti A, Liuzzi M, Chiara E. Going through the lockdown: a longitudinal study on the psychological consequences of the coronavirus pandemic. *Res Psychother.* 2021 Jan 20;23(3):494. doi: 10.4081/ripppo.2020.494.

PMID: 33585300; PMCID: PMC7875066.\*

63: Wickersham A, Carr E, Hunt R, Davis JP, Hotopf M, Fear NT, Downs J, Leightley D. Changes in Physical Activity among United Kingdom University Students Following the Implementation of Coronavirus Lockdown Measures. *Int J Environ Res Public Health*. 2021 Mar 10;18(6):2792. doi: 10.3390/ijerph18062792. PMID: 33801836; PMCID: PMC8041092.

64: Farrés-Godayol P, Jerez-Roig J, Minobes-Molina E, Yildirim M, Goutan-Roura E, Coll-Planas L, Escribà-Salvans A, Molas-Tuneu M, Moreno-Martin P, Rierola-Fochs S, Rierola-Colomer S, Romero-Mas M, Torres-Moreno M, Naudó-Molist J, Bezerra de Souza DL, Booth J, Skelton DA, Giné-Garriga M. Urinary incontinence and sedentary behaviour in nursing home residents in Osona, Catalonia: protocol for the OsoNaH project, a multicentre observational study. *BMJ Open*. 2021 Apr 20;11(4):e041152. doi: 10.1136/bmjopen-2020-041152. PMID: 33879481; PMCID: PMC8061864.

65: McInnerney D, Candy B, Stone P, Kupeli N. Let It Out (LIO) study: protocol for a mixed-methods study to optimise the design and assess the feasibility of an online emotional disclosure-based intervention in UK hospices. *BMJ Open*. 2021 May 11;11(5):e047135. doi: 10.1136/bmjopen-2020-047135. PMID: 33980530; PMCID: PMC8117994.

66: Kok N, van Gorp J, Teerenstra S, van der Hoeven H, Fuchs M, Hoedemaekers C, Zegers M. Coronavirus Disease 2019 Immediately Increases Burnout Symptoms in ICU Professionals: A Longitudinal Cohort Study. *Crit Care Med*. 2021 Mar 1;49(3):419-427. doi: 10.1097/CCM.0000000000004865. PMID: 33555778.

\*Also listed in PsycInfo

\*\* Also listed in Web of Science

### **Web of Science**

67. Backhaus, I., Sisenop, F., Begotaraj, E., Cachia, J., Capolongo, S., Carta, M. G., Jakubauskiene, M., Jevtic, M., Nakov, V., Pirlog, M. C., Grbic, D. S., Vinko, M., Kusturica, M. P., Morganti, A., & Lindert, J. (2021). Resilience and Coping With COVID-19: The

**Table E1.** Screening for inclusion criteria, comments, ratings, final decision, and additional rating concerning the presence of data before COVID-19

| Ref | Inclusion criteria |                         |                     |                 | Comments                                              | Included Rater 1/ Rater 2 | Additional rating |
|-----|--------------------|-------------------------|---------------------|-----------------|-------------------------------------------------------|---------------------------|-------------------|
|     | Original research  | Longitudinal comparison | Mental health focus | European sample |                                                       |                           |                   |
| 1   | ++                 | +/+                     | +/+                 | +/+             |                                                       | ++                        | +/+               |
| 2   | ++                 | +/+                     | +/+                 | +/+             |                                                       | ++                        | +/+               |
| 3   | ++                 | +/+                     | +/+                 | +/+             |                                                       | ++                        | +/+               |
| 4   | ++                 | +/+                     | +/+                 | +/+             |                                                       | ++                        | -/-               |
| 5   | ++                 | +/+                     | +/+                 | +/+             |                                                       | ++                        | +/+               |
| 6   | ++                 | +/+                     | +/+                 | +/+             |                                                       | ++                        | +/+               |
| 7   | ++                 | +/+                     | +/+                 | +/+             |                                                       | +/- → +                   | -/-               |
| 8   | -/-                | +/+                     | +/+                 | +/+             | Review and meta analysis                              | -/-                       | +/+               |
| 9   | ++                 | +/+                     | +/+                 | +/+             |                                                       | ++                        | -/-               |
| 10  | ++                 | -/-                     | +/+                 | +/+             |                                                       | -/-                       | -/-               |
| 11  | ++                 | +/+                     | +/+                 | +/+             |                                                       | ++                        | +/+               |
| 12  | -/-                | -/-                     | -/-                 | -/-             | Study protocol/ data collection on multiple sclerosis | -/-                       | -/-               |
| 13  | ++                 | +/+                     | +/+                 | +/+             |                                                       | ++                        | +/+               |
| 14  | ++                 | +/+                     | +/+                 | +/+             |                                                       | ++                        | +/+               |
| 15  | ++                 | +/+                     | +/+                 | +/+             |                                                       | ++                        | +/+               |
| 16  | ++                 | +/+                     | +/+                 | +/+             |                                                       | ++                        | +/+               |
| 17  | ++                 | -/-                     | +/+                 | +/+             | Study protocol/ first wave                            | -/-                       | -/-               |
| 18  | ++                 | -/-                     | +/+                 | +/+             | Cross-sectional data                                  | -/-                       | +/+               |
| 19  | ++                 | +/+                     | +/+                 | -/+             |                                                       | -/+ → +                   | +/+               |
| 20  | -/-                | -/-                     | +/+                 | +/+             | Study protocol                                        | -/-                       | -/-               |
| 21  | ++                 | +/+                     | +/+                 | +/+             |                                                       | ++                        | +/+               |
| 22  | ++                 | -/-                     | +/+                 | +/+             | Cross-sectional data (first wave)                     | -/-                       | -/-               |

|    |     |     |     |     |                                                   |         |     |
|----|-----|-----|-----|-----|---------------------------------------------------|---------|-----|
| 23 | ++  | +/+ | -/- | +/+ | Nutrition and exercise                            | -/-     | -/- |
| 24 | ++  | +/+ | +/+ | +/+ |                                                   | +/+     | +/+ |
| 25 | ++  | +/+ | +/+ | +/+ |                                                   | +/+     | -/- |
| 26 | ++  | +/+ | +/+ | +/+ |                                                   | +/+     | +/+ |
| 27 | ++  | -/? | +/+ | +/+ | Cross-sectional data (one wave)                   | -/+ → - | -/- |
| 28 | ++  | +/+ | +/+ | +/+ |                                                   | +/+     | +/+ |
| 29 | ++  | +/+ | +/+ | +/+ |                                                   | +/+     | +/+ |
| 30 | ++  | +/+ | +/+ | +/+ |                                                   | +/+     | +/+ |
| 31 | ++  | -/- | +/+ | -/- | Cross-sectional data, precarious migrants         | -/-     | -/- |
| 32 | ++  | +/+ | +/+ | +/+ |                                                   | +/+     | +/+ |
| 33 | ++  | +/+ | +/+ | +/+ |                                                   | +/+     | -/- |
| 34 | ++  | +/+ | +/+ | +/+ |                                                   | +/+     | +/+ |
| 35 | ++  | -/+ | +/- | +/+ | Cross sectional data (first wave), only EMA       | -/-     | -/- |
| 36 | -/- | -/- | +/+ | +/+ | Study protocol                                    | -/-     | -/- |
| 37 | ++  | +/+ | +/+ | +/+ |                                                   | +/+     | +/+ |
| 38 | ++  | +/+ | +/+ | +/+ | .                                                 | +/+     | +/+ |
| 39 | ++  | -/- | -/- | +/+ | Epilepsy, cross-sectional data (preliminary data) | -/-     | -/- |
| 40 | ++  | +/+ | +/+ | +/+ |                                                   | +/+     | -/- |
| 41 | ++  | +/+ | +/+ | +/+ |                                                   | +/+     | +/+ |
| 42 | ++  | +/+ | +/+ | +/+ |                                                   | +/+     | -/- |
| 43 | ++  | +/+ | +/+ | +/+ |                                                   | +/+     | -/- |
| 44 | ++  | +/+ | -/- | +/+ |                                                   | -/-     | -/- |
| 45 | ++  | +/+ | +/+ | +/+ |                                                   | +/+     | -/- |
| 46 | ++  | +/+ | +/+ | +/+ |                                                   | +/+     | -/- |
| 47 | ++  | -/- | +/+ | +/+ | Cross sectional data (first wave)                 | -/-     | -/- |
| 48 | ++  | +/+ | +/+ | +/+ |                                                   | +/+     | -/- |
| 49 | ++  | +/+ | +/+ | +/+ |                                                   | +/+     | -/- |
| 50 | ++  | -/- | +/+ | -/? | Cross sectional data                              | -/-     | -/- |

|    |     |     |     |     |                                                             |         |     |
|----|-----|-----|-----|-----|-------------------------------------------------------------|---------|-----|
| 51 | ++  | +/? | +/+ | +/+ |                                                             | ++      | -/- |
| 52 | ++  | +/+ | +/+ | +/+ |                                                             | ++      | -/- |
| 53 | ++  | +/+ | +/? | +/+ |                                                             | +/- → + | -/- |
| 54 | ++  | -/- | -/+ | +/+ | Cross sectional data                                        | -/-     | -/- |
| 55 | ++  | +/+ | +/+ | +/+ |                                                             | ++      | +/+ |
| 56 | ++  | +/+ | -/- | +/+ | Remote consulting in general practitioners                  | -/-     | +/+ |
| 57 | -/- | -/- | +/+ | +/+ | Study protocol                                              | -/-     | -/- |
| 58 | ++  | +/+ | +/+ | +/+ |                                                             | ++      | +/+ |
| 59 | ++  | +/+ | +/+ | +/+ |                                                             | ++      | -/- |
| 60 | ++  | -/- | +/+ | +/+ | Cross-sectional data                                        | -/-     | -/- |
| 61 | -/- | -/- | +/+ | +/+ | Commentary                                                  | -/-     | -/- |
| 62 | ++  | +/+ | +/+ | +/+ |                                                             | ++      | -/- |
| 63 | ++  | +/+ | -/- | +/+ | Physical activity                                           | -/-     | -/- |
| 64 | -/- | -/- | -/- | +/+ | Study protocol, urinary incontinence and sedentary behavior | -/-     | -/- |
| 65 | -/- | -/- | +/+ | +/+ | Study protocol                                              | -/-     | -/- |
| 66 | ++  | +/+ | +/+ | +/+ |                                                             | ++      | +/+ |
| 67 | -/- | -/- | +/+ | +/+ | Study protocol                                              | -/-     | -/- |

Notes. “+” and “-“ indicate “yes” and “no” responses for two independent reviewers, separated by “/”; → final consent

**Table E2.** Interrater Reliability with Cohen’s Kappa

|                                                                                       |   | Included (Rater 1) |           | Σ         |
|---------------------------------------------------------------------------------------|---|--------------------|-----------|-----------|
|                                                                                       |   | +                  | -         |           |
| Included (Rater 2)                                                                    | + | 39                 | 2         | <b>41</b> |
|                                                                                       | - | 2                  | 24        | <b>26</b> |
| Σ                                                                                     |   | <b>41</b>          | <b>26</b> | <b>67</b> |
| Analyses yield the following values: $p_0 = .94$ , $p_e = .54$ , and $\kappa = .87$ . |   |                    |           |           |
