# Supplementary material for: Mental Health in Times of the COVID-19 Pandemic
Source: Atypon-hosted journal article supplement (doi:10.1027/1016-9040/a000465), 2021-10-01
Supplement: 1016-9040_a000465_esm2.pdf [file 1016-9040_a000465_esm2.pdf]

**Table E2.** Longitudinal European studies including pre-pandemic and pandemic data identified in the selective review.

| First author      | Publication date | Sample*                                                                | State       | Design**                                                                                                      | Main results***                                                                                                                                                                                                                 |
|-------------------|------------------|------------------------------------------------------------------------|-------------|---------------------------------------------------------------------------------------------------------------|---------------------------------------------------------------------------------------------------------------------------------------------------------------------------------------------------------------------------------|
| Alivernini et al. | Jan 2021         | Adolescents (N = 347), mean age = 16.3 (range: 14-19)                  | Italy       | April 2019 vs. May 2020, Longitudinal online survey                                                           | Increased negative affect; decreased positive affect; no influence on distancing; no effect sizes given                                                                                                                         |
| Bu et al. (a)     | Sep 2020         | General population (N = 31064 vs. 60341), age ≥ 18; age groups given   | UK          | January 2017 to June 2019 (UK Household Longitudinal study) vs. March to May 2020 (UCL COVID-19 Social Study) | Loneliness RF: young adults, living alone, lower education or income, economically inactive, women, ethnic minorities, urban residents; regression coefficients given                                                           |
| Castellini et al. | Feb 2021         | General population (N = 130), mean age = 34.0 (range: 18-60)           | Italy       | December 2019 to January 2020 vs. April to May 2020 Longitudinal Study                                        | Increase of depressive (T0: $0.57 \pm 0.48$ ; T1: $0.73 \pm 0.65$ ; $p = 0.003$ ) and phobic anxiety symptoms (T0: $0.26 \pm 0.43$ ; T1: $0.48 \pm 0.63$ ; $p < 0.001$ )<br>RF: pre-pandemic psychopathology (OR = 2.3 to 4.29) |
| Ehrler et al.     | Apr 2021         | Families with children (N = 200), mean age of children = 10.8 and 12.4 | Switzerland | July 2017 to March 2020 vs. April to May 2020 Prospective cohort study                                        | Child well-being decreased ( $B = -5.05$ ; $R^2_B = 0.066$ ), family function decreased ( $B = -1.11$ ; $R^2_B = 0.084$ )                                                                                                       |
| Elmer et al.      | Feb 2020         | Undergraduate students (N = 212) no age reported                       | Switzerland | 2018 vs. April to May 2020 Longitudinal study                                                                 | Fewer interaction partners and fewer study partners or no study partner; more depressed ( $d = .34$ ), more anxious ( $d = .34$ ), stressed ( $d = .23$ ), lonely ( $d = .07$ )                                                 |
| Evans et al.      | Apr 2021         | Undergraduate students (N = 254) mean age = 19.76 (range: 18-31)       | UK          | October 2019 vs. April to May 2020 Longitudinal online survey                                                 | Increase in depression ( $\eta^2 = .25$ ), decrease in well-being ( $\eta^2 = .12$ ) and alcohol use ( $\eta^2 = .1$ )                                                                                                          |

|                 |          |                                                                                                                  |             |                                                                                                   |                                                                                                                                                                                                                                                                                              |
|-----------------|----------|------------------------------------------------------------------------------------------------------------------|-------------|---------------------------------------------------------------------------------------------------|----------------------------------------------------------------------------------------------------------------------------------------------------------------------------------------------------------------------------------------------------------------------------------------------|
|                 |          |                                                                                                                  |             |                                                                                                   | No significant changes in anxiety, loneliness, or sleep quality                                                                                                                                                                                                                              |
| Ezpeleta et al. | Oct 2020 | General population, parents (N = 226), children (N = 226), mean age of children = 13.9                           | Spain       | March to May 2020<br>Longitudinal online survey                                                   | Unhealthier activities, worsening of the relationships with others, and dysfunctional parenting style, no change in hyperactivity–inattention problems, increase in emotional, conduct and total problems ( $f^2 = 0.14–0.27$ ), peer and prosocial behavior problems ( $f^2 = 0.61–0.79$ ). |
| Giebel et al.   | Jan 2021 | Older adults and caregivers (N = 377) age $\geq 18$ and $\geq 65$                                                | UK          | May 2020 + 2 time points (+6, +12 weeks),<br>Longitudinal online or telephone survey              | Social support service usage dropped (27 % to 6 %), anxiety decreased, depression increased, access to paid care was least affected by COVID-19, well-being increased significantly for older adults over time (no effect sizes given)                                                       |
| Janssen et al.  | Oct 2020 | Parents (N = 67), adolescents (N = 34) mean age of parents = 58.2, mean age of adolescents = 16.0 (range: 11-17) | Netherlands | 2018 to 2019 vs. April 2020,<br>Dutch multi-method two-generation longitudinal study              | No change in levels of depressive symptoms, more negative affect among parents ( $B = 0.096$ , $SE = .025$ , $df = 5982$ , $t = 3.900$ , $p < .001$ ), no significant change of negative affect among adolescent ( $B = 0.016$ , $SE = .027$ , $df = 2618$ , $t = 0.595$ , $p = .552$ )      |
| Kivi et al.     | Feb 2021 | Older adults (N = 1071) mean age = 63.12 (in 2015)                                                               | Sweden      | 2015 to 2020,<br>Longitudinal Health, Aging and Retirement Transitions in Sweden (HEARTS) project | perceived health comparable, financial satisfaction stable across time ( $\beta = 0.002$ , $p = .79$ ), higher in 2020 compared to all previous years ( $\beta = 0.09$ , $p < .001$ ), life satisfaction stable over time (life                                                              |

|                   |          |                                                                                                                                           |             |                                                                                                                                                                                        |                                                                                                                                                                                                                                                                                   |
|-------------------|----------|-------------------------------------------------------------------------------------------------------------------------------------------|-------------|----------------------------------------------------------------------------------------------------------------------------------------------------------------------------------------|-----------------------------------------------------------------------------------------------------------------------------------------------------------------------------------------------------------------------------------------------------------------------------------|
|                   |          |                                                                                                                                           |             |                                                                                                                                                                                        | satisfaction: $\beta = 0.02$ , $p = .32$ ;<br>loneliness: $\beta = -0.01$ , $p = .84$ )                                                                                                                                                                                           |
| Kok et al.        | Mar 2021 | ICU professionals<br>(N = 252 vs. 233)<br>mean age = 42.6                                                                                 | Netherlands | October to December 2019 vs. May<br>to June 2020,<br>Longitudinal open cohort design                                                                                                   | Increased prevalence of burnout<br>symptoms (23 vs. 36.1%);<br>RF: ICU professionals (nurses: OR<br>= 1.77; with COVID-19 care: OR =<br>1.87, physicians = 3.56), working<br>overtime (OR = 2.11)                                                                                 |
| Naurin et al.     | Feb 2021 | Pregnant women with<br>their partners (N = 6941)<br>age $\geq 16$                                                                         | Sweden      | September 2019 to August 2020,<br>longitudinal survey                                                                                                                                  | Worry increased (health); partners<br>similar but less dramatic                                                                                                                                                                                                                   |
| Niedzwiedz et al. | Mar 2021 | General population (N =<br>9748)<br>age >18, age groups with<br>percentages given                                                         | UK          | 2015 to 2020<br>UK Household Longitudinal Study                                                                                                                                        | Psychological distress increased<br>(17.6 to 30.6%; RR: 1.3);<br>Loneliness remained stable;<br>Smoking declined; drinking four or<br>more times per week increased;<br>increased binge drinking; Smoking<br>declined<br>RF: < 45 years, women, Asian<br>minority, high education |
| Okely et al.      | Okt 2020 | Older adults (N = 137),<br>mean age = 84                                                                                                  | UK          | 2018 vs. 2020<br>Lothian birth cohort 1936                                                                                                                                             | levels of physical activity were<br>reduced (10 to 19% minimal<br>activity); perceived social support<br>increased during lockdown ( $d =$<br>.178)                                                                                                                               |
| Pan et al.        | Feb 2021 | Patients with obsessive-<br>compulsive disorder,<br>depression, anxiety (N =<br>1181), healthy<br>participants (N = 336)<br>age $\geq 18$ | Netherlands | 2006-2016 vs.<br>April 1 to May 13 2020<br>Netherlands studies of Depression<br>and Anxiety, of Depression in Older<br>Persons, and Obsessive Compulsive<br>Disorder Association Study | depression ( $\beta = .26$ ), worry ( $\beta =$<br>.66), and loneliness ( $\beta = .22$ )<br>increased, no greater level of<br>emotional reactivity in clinical<br>population                                                                                                     |
| Pierce et al.     | Oct 2020 | General population<br>(N = 17452),<br>age >16, age groups given                                                                           | UK          | 2018-19 vs. April 2020<br>Online Survey<br>UK Household Longitudinal Study<br>(UKHLS)                                                                                                  | mental distress rose from 18.9%<br>(95% CI 17.8-20.0) in 2018-19 to<br>27.3% (26.3-28.2), GHQ-12<br>increased from 11.5 (95% CI 11.3-                                                                                                                                             |

|                          |          |                                                             |         |                                                                                           |                                                                                                                                                                                                                                                                              |
|--------------------------|----------|-------------------------------------------------------------|---------|-------------------------------------------------------------------------------------------|------------------------------------------------------------------------------------------------------------------------------------------------------------------------------------------------------------------------------------------------------------------------------|
|                          |          |                                                             |         |                                                                                           | 11.6) in 2018-19, to 12.6 (12.5-12.8) in April 2020; 0.48 (95% CI 0.07-0.90) points higher than expected when accounting for previous upward trends between 2014 and 2018                                                                                                    |
| Proto & Quintana-Domeque | Jan 2021 | General population (N = 14523)                              | UK      | 2017 to 2019 vs. April 2020<br>UK Household Longitudinal Study (UKHLS)                    | average mental distress (GHQ-12: 0-36) increased from 11.44 [95% CI: 11.36, 11.52] in 2017-2019 to 12.52 [95% CI: 12.40, 12.65] in April 2020,<br>RF: women; Black, Asian and minority ethnic men                                                                            |
| Ramiz et al.             | Mar 2021 | General population (N = 1237), mean age = 62 (range: 23-93) | France  | November 2014 to December 2019 vs. March to May 2020<br>Longitudinal study, online Survey | Levels increased for physical health and decreased for mental health;<br>no change for depression;<br>anxiety increased (17.3 to 20.1%);<br>RF: women, the elderly and the youngest, > 2h social media (OR = 2.14), COVID-19 diagnosis (OR = 2.18), living alone (OR = 1.78) |
| Savage et al.            | Mar 2021 | University students (N = 255) age ≥ 18, age groups given    | UK      | October 2019 vs. October 2020                                                             | Mental wellbeing and physical activity decreased (45.2 to 42.3 (p < 0.001); 223 to 173 min/week (p < 0.001), perceived stress and time spent sedentary increased (19.8 to 22.8 (p < 0.001); 66.0 to 71.2 h/week (p = 0.036))                                                 |
| Savolainen et al.        | Jan 2021 | Workers (N = 1044) mean age = 45.0 (range: 18-66)           | Finland | September to October 2019 vs. September to October 2020<br>Longitudinal Study             | Perceived loneliness ( $\beta = 0.11, p = 0.005$ ), psychological distress ( $\beta = 0.17, p < 0.001$ ), technostress technostress ( $\beta = 0.17, p < 0.001$ ), neuroticism neuroticism ( $\beta = 0.17,$                                                                 |

|                       |          |                                                                                    |                               |                                                                                                                                                                                        |                                                                                                                                                                                                                       |
|-----------------------|----------|------------------------------------------------------------------------------------|-------------------------------|----------------------------------------------------------------------------------------------------------------------------------------------------------------------------------------|-----------------------------------------------------------------------------------------------------------------------------------------------------------------------------------------------------------------------|
|                       |          |                                                                                    |                               |                                                                                                                                                                                        | $p < 0.001$ ) identified as robust psychological predictors of COVID-19 anxiety;<br>RF: women                                                                                                                         |
| Step toe & Di Gessa   | Jun 2021 | People with and without physical disabilities (N = 4887), mean age = 60.3 and 70.9 | England                       | 2018-2019 vs. June to July 2020<br>English Longitudinal Study of Aging                                                                                                                 | Consistent associations of physical disability with greater depression (OR = 1.78) and loneliness (OR = 1.52); lower well-being, quality of life, and sleep quality (OR = 1.44)                                       |
| Stolz et al.          | Feb 2021 | Older adults, age > 60                                                             | Austria                       | 2013 to 2017 vs. May 2020 and March 2020 to June 2020<br>Comparison to pre- and pandemic data, cross sectional correlation, longitudinal analysis of weekly changes                    | Increase in Loneliness with restrictions (unadjusted effect size = 0.36); “effects seem to be short-lived, and thus no strong negative consequences for older adults' mental health”                                  |
| Thombs et al.         | Dec 2020 | Scleroderma patients (N = 159 in France and 50 in UK) mean age = 53.8 and 59.2     | France and UK (Canada and US) | July 1 2019 to December 31 2019 vs. April 9 to 27 2020<br>Scleroderma Patient-centered Intervention Network Cohort data                                                                | Anxiety increased for France and UK, no changes in depression (no effect sizes given)                                                                                                                                 |
| Van der Velden et al. | Oct 2020 | General population (N = 3983) age categories given                                 | Netherlands                   | March 2019 vs. March 2020<br>Dutch longitudinal population-based LISS panel                                                                                                            | No significant differences in Anxiety and Depression Symptoms and Emotional Support levels                                                                                                                            |
| Van der Velden et al. | Jan 2021 | General Population (N = 4084) age categories given                                 | Netherlands                   | October 2019 (T1) and June 2020 (T4), and anxiety and depression symptoms in November 2019 (T2), March 2020 (T3) and June 2020 (T4),<br>Dutch longitudinal population-based LISS panel | Lower anxiety and depression symptoms at T4 in comparison with T1; emotional loneliness increased (OR = 1.61); symptoms increased significantly among those who became lonely during the pandemic (OR = 1.10 to 1.63) |

RF = Risk factor; PF = Protective Factor

\* Description of the sample with sample size, age (minimum age and/or average age and range) - if reported in the manuscript;

\*\* Description of the designs with information on the measurement time points and type of study - if reported in the manuscript.

\*\*\* Description of the main results, indicating the main statistical parameters, if reported.
