# Supplementary material for: Mental Health in Times of the COVID-19 Pandemic
Source: Atypon-hosted journal article supplement (doi:10.1027/1016-9040/a000465), 2021-10-01
Supplement: 1016-9040_a000465_esm3.pdf [file 1016-9040_a000465_esm3.pdf]

**Table E3.** Longitudinal European studies including pandemic data identified in the selective review.

| First author      | Publication date | Sample*                                                                                              | State   | Design**                                                                                                         | Main results***                                                                                                                                                                                                                                                                                                                                                                                                                                                                                                                                  |
|-------------------|------------------|------------------------------------------------------------------------------------------------------|---------|------------------------------------------------------------------------------------------------------------------|--------------------------------------------------------------------------------------------------------------------------------------------------------------------------------------------------------------------------------------------------------------------------------------------------------------------------------------------------------------------------------------------------------------------------------------------------------------------------------------------------------------------------------------------------|
| Beck et al.       | Feb 2021         | General population (N = 1005 (T0), N = 1005 (T1), N = 2003 (T2), N = 1736 (T3), age categories given | France  | 4 repetitive cross-sectional surveys, March 31 to April 2 2020, April 15-17 2020, May 7-10 2020, June 10-12 2020 | Prevalence of sleep problems decreased over time, no exact odds ratios reported (given in a figure)                                                                                                                                                                                                                                                                                                                                                                                                                                              |
| Bendau et al. (a) | Feb 2021         | General population (N = 2376), only participants who completed > 2 surveys, mean age = 38.8          | Germany | Longitudinal observation, 4 waves March 27 to June 15 2020                                                       | No changes in depressive symptoms (PHQ-2; $d = .03$ , $p = .230$ ), decreasing COVID-19-related anxiety ( $d = .41$ , $p < .001$ ) and anxiety (GAD-2: $d = .19$ , $p < .001$ );<br>RF: Suppression ( $r = -.01$ to $.09$ ), unhealthy habits (reduced physical activity and healthy diet, more substance use; $r = .00$ to $.12$ ), thinking about pandemic ?<br>PF: Self-efficacy ( $r = -.07$ to $-.14$ ), social contacts ( $r = -.00$ to $-.15$ ), medical support ( $r = -.05$ to $-.15$ ), psychological support ( $r = -.01$ to $-.09$ ) |
| Bendau et al. (b) | Apr 2021         | General Population N = 4175 (T0), N = 1040 (T1), N = 803 (T2), N = 503 (T3), mean age = 36.9         | Germany | Longitudinal observation, 4 waves March 27 to June 15 2020                                                       | RF: Individuals with mental (esp. anxiety) disorders had more COVID-19-related fear, anxiety, and depressive symptoms ( $b = .216$ to $.866$ ); female ( $b = .053$ to $.20$ ); older age: COVID-19 related fear ( $b = .005$ ), younger age: depressive ( $b = .009$ ) and anxiety symptoms ( $b = .003$ ); symptoms decreased over time in individuals with                                                                                                                                                                                    |

|                          |          |                                                                                               |                        |                                                                                                                            |                                                                                                                                                                                                                                                                                                                      |
|--------------------------|----------|-----------------------------------------------------------------------------------------------|------------------------|----------------------------------------------------------------------------------------------------------------------------|----------------------------------------------------------------------------------------------------------------------------------------------------------------------------------------------------------------------------------------------------------------------------------------------------------------------|
|                          |          |                                                                                               |                        |                                                                                                                            | anxiety disorder (b = -.088 to -.104)                                                                                                                                                                                                                                                                                |
| Bu et al. (b)            | Nov 2020 | General Population (N = 38217), age ≥ 18, age categories given                                | UK                     | Longitudinal panel study with weekly data collection, UCL COVID-19 Social Study, March 23 to May 10 2020,                  | RF concerning loneliness: young age (OR = 2.17-6.81), female gender (OR = 1.59), low income (OR = 1.3), economically inactive (OR = 1.3-2.04), mental health condition (OR = 5.32)<br>PF: living with others (OR = .25-.45), rural environment (OR = .76-.92), social support (OR = .11-.54)                         |
| Cheval et al.            | Mar 2021 | Participants recruited through social media N = 267 (T1), N = 110 (T2), mean age = 40.0       | France and Switzerland | Observational longitudinal study, March 30 to April 7 vs. April 13 to 21                                                   | RF: sedentary behavior associated with poorer physical health ( $\beta$ = -.35, p = .002), mental health ( $\beta$ = -.25, p = .003), and subjective vitality ( $\beta$ = -.30, p = .004);<br>PF: increased physical activity associated with better physical health ( $\beta$ = .24, p = .002).                     |
| Fancourt et al.          | Feb 2021 | General population (N = 36520), age ≥ 18, age categories given                                | UK                     | Prospective longitudinal observational study with weekly assessments, UCL COVID-19 Social Study, March 23 to August 9 2020 | Anxiety (b = -1.93, p < .0001) and depression (b = -2.52, p < .0001) declined during first 20 weeks of lockdown; RF: female gender (b = 1.34 and 1.08), young age (b = 1.38 to 4.02 and 1.86 to 4.57), lower education (b = .75 and 1.13) and income (b = .65 and 1.09), pre-existing mental illness (5.18 and 5.83) |
| González-Sanguino et al. | Apr 2021 | General population N = 3480 (T0), N = 1041 (T1), N = 569 (T2), age ≥ 18, age categories given | Spain                  | Longitudinal online survey, March 21 to 29 (T0), April 13 to 27 (T1) and May 21 to June 4 (T2) 2020                        | Increased depression in T1 (Z = 7.06, p < .001), no changes in anxiety (Z = .13 to .25), downward trend for posttraumatic stress disorder (Z = 3.25, p < .01);                                                                                                                                                       |

|                |          |                                                                                            |         |                                                                                                                      |                                                                                                                                                                                                                                                                    |
|----------------|----------|--------------------------------------------------------------------------------------------|---------|----------------------------------------------------------------------------------------------------------------------|--------------------------------------------------------------------------------------------------------------------------------------------------------------------------------------------------------------------------------------------------------------------|
|                |          |                                                                                            |         |                                                                                                                      | RF: loneliness, female gender (anxiety, PTSD), younger age (depression)<br>PF: spiritual well-being<br>R <sup>2</sup> = .163 to .423                                                                                                                               |
| Groarke et al. | Apr 2021 | General population (N = 1958), mean age = 31.01 (range: 18-87)                             | UK      | Online Survey, three repeated measures, monthly, March to June 2020                                                  | High stability in loneliness and depression                                                                                                                                                                                                                        |
| Gullo et al.   | Jan 2021 | General population N = 411 (T1), N = 210 (T2), N = 167 (T3), N = 147 (T4), mean age = 34.5 | Italy   | Online questionnaire, 4 data points, April 2 to 9 (T1), April 20 to 29 (T2), May 4 to 11 (T3), May 28 to June 4 2020 | Depression (d = .74) and anxiety (d = .67) higher than normative samples, coping and social support lower<br>RF: female gender (d = .40 and .53), unemployment (d = .65 and .61), students (d = .28 and .27)<br>PF: higher age (r = -.223 and -.141)               |
| Herle et al.   | Apr 2021 | General population (N = 22374), age categories given                                       | UK      | UCL COVID-19 Social Study, March 28 to May 29 2020                                                                   | No changes in eating<br>RF: loneliness (eating more: OR = 1.07), single/ divorced and stressful life events (eating less: OR = 1.69)<br>PF: Higher education (OR = .54-.77)                                                                                        |
| Madsen et al.  | Apr 2021 | Individuals with diabetes (N = 1366), age ≥ 18, mean age = 61.7                            | Denmark | Longitudinal online survey, 6 waves, March 19 to June 25 2020                                                        | Loneliness increased, quality of life decreased during lockdown, improvements after reopening (no effect sizes given)<br>PF: (T1 to T6) women with larger decrease in social isolation and psychological distress; stronger increase in quality of life (p < .001) |
| Matiz et al.   | Sep 2020 | Female teachers (N = 58), mean age = 50.8                                                  | Italy   | 8-week mindfulness-oriented meditation intervention February 6 to 11 (T0) and April 2 to 15 2020 (T1)                | PF: Resilience (HADS: t = 4.31, p < .01) and mindfulness                                                                                                                                                                                                           |

|                      |          |                                                                                   |                                  |                                                                                                                 |                                                                                                                                      |
|----------------------|----------|-----------------------------------------------------------------------------------|----------------------------------|-----------------------------------------------------------------------------------------------------------------|--------------------------------------------------------------------------------------------------------------------------------------|
|                      |          |                                                                                   |                                  |                                                                                                                 |                                                                                                                                      |
| Megalakaki et al.    | May 2021 | General population (N = 1123 (T0), N = 323 (T1)), mean age = 33.82 (range: 18-80) | France                           | Two-wave design, 3-4 Month after nationwide lockdown, March 25 to April 2020 (T0), June 18 to July 10 2020 (T1) | Baseline distress predicted 14-20% of variance in post-traumatic, anxiety and depression symptoms<br>RF: female (OR = 3.09)          |
| Romero-Duarte et al. | May 2021 | COVID-19 patients N = 969 mean age = 63.0                                         | Spain                            | Retrospective observational 6-month follow-up study, starting March 1 to April 2020                             | mental health impariments (12.2%), women higher frequencies of mental health impariments                                             |
| Salfi et al.         | Mar 2021 | General Population (N = 2013) mean age = 34.8                                     | Italy                            | March and April 2020 vs. November and December 2020                                                             | Depression unchanged, higher distress, RF: female, negative COVID-19 impact, advanced age, healthcare worker; PF: higher education   |
| Varga at al.         | Mar 2021 | General population (N = 205084), mean age = 44.5                                  | Denmark, France, Netherlands, UK | Time-series survey data, March to July 2020, includes data from UCL COVID-19 Social Study                       | Poor mental health in lockdown, RF: (loneliness) young age, female, chronic disease, previous mental illness (no effect sizes given) |
| Wright et al.        | Mar 2021 | General population (N = 46284) age ≥ 18, age categories given                     | UK                               | Weekly assessments between April 1 to May 12 2020<br>UCL COVID-19 Social Study                                  | RF: worries associated with low sleep quality (OR = 1.16)<br>PF: close friends (OR = .97)                                            |

RF = Risk factor; PF = Protective Factor; PHQ = Patient Health Questionnaire; GAD = Generalized Anxiety Disorder; HADS = Hospital Anxiety and Depression Scale

\* Description of the sample with sample size, age (minimum age and/or average age and range) - if reported in the manuscript;

\*\* Description of the designs with information on the measurement time points, type of study - if reported in the manuscript.

\*\*\* Description of the main results, indicating the main statistical parameters, if reported.
